# Supplementary material for: Balancing selection on a recessive lethal deletion with pleiotropic effects on two neighboring genes in the porcine genome
Source: PLoS Genet. 2018 Sep 19;14(9):e1007661. doi: 10.1371/journal.pgen.1007661 (PMC6166978; doi:10.1371/journal.pgen.1007661)
Supplement: S4 Table — (XLSX) [file pgen.1007661.s014.xlsx]

## Sheet: Table S4
Table S4: Haplotypes from the four tracked carrier-by-carrier matings, including parent animals
Litter_ID	Animal_ID	Phenotype	LRR_intensity_deletion_markers	Haplotype1	Haplotype2	Carrier Status	Sire_Haplotype1	Sire_Haplotype2	Dam_Haplotype1	Dam_Haplotype2
CC1	2846	Stillborn	-0.1265	TGACGTCTAACCAATAATCACAGCA	TGGAACTTAACCAATAATCACAGCA	Carrier	TGACGTCTAACCAATAATCACAGCA	TGGAACTTAACCAATAATCACAGCA	TGACGTCTAACCAATAATCACAGCA	TGGAACTTAACCAATAATCACAGCA
CC1	2847	Liveborn	-0.396464	TGGAACTTAACCAATAATCACAGCA	TGACGTCTAACCAATAATCACAGCA	Carrier	TGACGTCTAACCAATAATCACAGCA	TGGAACTTAACCAATAATCACAGCA	TGACGTCTAACCAATAATCACAGCA	TGGAACTTAACCAATAATCACAGCA
CC1	2848	Liveborn	-0.338159	TGACGTCTAACCAATAATCACAGCA	TGGAACTTAACCAATAATCACAGCA	Carrier	TGACGTCTAACCAATAATCACAGCA	TGGAACTTAACCAATAATCACAGCA	TGACGTCTAACCAATAATCACAGCA	TGGAACTTAACCAATAATCACAGCA
CC1	2849	Liveborn	-0.0979645	TGGAACTTAACCAATAATCACAGCA	TGGAACTTAACCAATAATCACAGCA	Non-carrier	TGACGTCTAACCAATAATCACAGCA	TGGAACTTAACCAATAATCACAGCA	TGACGTCTAACCAATAATCACAGCA	TGGAACTTAACCAATAATCACAGCA
CC1	2850	Liveborn	-0.380092	TGACGTCTAACCAATAATCACAGCA	TGGAACTTAACCAATAATCACAGCA	Carrier	TGACGTCTAACCAATAATCACAGCA	TGGAACTTAACCAATAATCACAGCA	TGACGTCTAACCAATAATCACAGCA	TGGAACTTAACCAATAATCACAGCA
CC1	2851	Liveborn	-0.390241	TGACGTCTAACCAATAATCACAGCA	TGGAACTTAACCAATAATCACAGCA	Carrier	TGACGTCTAACCAATAATCACAGCA	TGGAACTTAACCAATAATCACAGCA	TGACGTCTAACCAATAATCACAGCA	TGGAACTTAACCAATAATCACAGCA
CC1	2853	Liveborn	-0.0673691	TGGAACTTAACCAATAATCACAGCA	TGGAACTTAACCAATAATCACAGCA	Non-carrier	TGACGTCTAACCAATAATCACAGCA	TGGAACTTAACCAATAATCACAGCA	TGACGTCTAACCAATAATCACAGCA	TGGAACTTAACCAATAATCACAGCA
CC2	7347	Liveborn	-0.347693	TGACGTCTAACCAATAATCACAGCA	CGACGTCTAACTAATAATCACAGCA	Carrier	TGACGTCTAACCAATAATCACAGCA	CGACGTCTAACTAATAATCACAGCA	TGACGTCTAACCAATAATCACAGCA	TGGAACTCACTCCGTGGGTACAATA
CC2	7348	Liveborn	-0.271117	TGACGTCTAACCAATAATCACAGCA	CGACGTCTAACTAATAATCACAGCA	Carrier	TGACGTCTAACCAATAATCACAGCA	CGACGTCTAACTAATAATCACAGCA	TGACGTCTAACCAATAATCACAGCA	TGGAACTCACTCCGTGGGTACAATA
CC2	7349	Liveborn	-0.38879	TGGAACTCACTCCGTGGGTACAATA	TGACGTCTAACCAATAATCACAGCA	Carrier	TGACGTCTAACCAATAATCACAGCA	CGACGTCTAACTAATAATCACAGCA	TGACGTCTAACCAATAATCACAGCA	TGGAACTCACTCCGTGGGTACAATA
CC2	7350	Liveborn	0.00359774	CGACGTCTAACTAATAATCACAGCA	TGGAACTCACTCCGTGGGTACAATA	No-carrier	TGACGTCTAACCAATAATCACAGCA	CGACGTCTAACTAATAATCACAGCA	TGACGTCTAACCAATAATCACAGCA	TGGAACTCACTCCGTGGGTACAATA
CC2	7351	Liveborn	-0.385778	TGGAACTCACTCCGTGGGTACAATA	TGACGTCTAACCAATAATCACAGCA	Carrier	TGACGTCTAACCAATAATCACAGCA	CGACGTCTAACTAATAATCACAGCA	TGACGTCTAACCAATAATCACAGCA	TGGAACTCACTCCGTGGGTACAATA
CC2	7352	Liveborn	0.0673963	CGACGTCTAACTAATAATCACAGCA	TGGAACTCACTCCGTGGGTACAATA	No-carrier	TGACGTCTAACCAATAATCACAGCA	CGACGTCTAACTAATAATCACAGCA	TGACGTCTAACCAATAATCACAGCA	TGGAACTCACTCCGTGGGTACAATA
CC2	7353	Liveborn	-0.320043	TGACGTCTAACCAATAATCACAGCA	CGACGTCTAACTAATAATCACAGCA	Carrier	TGACGTCTAACCAATAATCACAGCA	CGACGTCTAACTAATAATCACAGCA	TGACGTCTAACCAATAATCACAGCA	TGGAACTCACTCCGTGGGTACAATA
CC2	7354	Liveborn	-0.388383	TGACGTCTAACCAATAATCACAGCA	TGGAACTCACTCCGTGGGTACAATA	Carrier	TGACGTCTAACCAATAATCACAGCA	CGACGTCTAACTAATAATCACAGCA	TGACGTCTAACCAATAATCACAGCA	TGGAACTCACTCCGTGGGTACAATA
CC2	7355	Liveborn	-0.406278	TGGAACTCACTCCGTGGGTACAATA	TGACGTCTAACCAATAATCACAGCA	Carrier	TGACGTCTAACCAATAATCACAGCA	CGACGTCTAACTAATAATCACAGCA	TGACGTCTAACCAATAATCACAGCA	TGGAACTCACTCCGTGGGTACAATA
CC2	7356	Liveborn	-0.424144	TGGAACTCACTCCGTGGGTACAATA	TGACGTCTAACCAATAATCACAGCA	Carrier	TGACGTCTAACCAATAATCACAGCA	CGACGTCTAACTAATAATCACAGCA	TGACGTCTAACCAATAATCACAGCA	TGGAACTCACTCCGTGGGTACAATA
CC2	7357	Liveborn	-0.0141967	TGGAACTCACTCCGTGGGTACAATA	CGACGTCTAACTAATAATCACAGCA	No-carrier	TGACGTCTAACCAATAATCACAGCA	CGACGTCTAACTAATAATCACAGCA	TGACGTCTAACCAATAATCACAGCA	TGGAACTCACTCCGTGGGTACAATA
CC2	7360	Mummified	-0.80475	TGACGTCTAACCAATAATCACAGCA	TGACGTCTAACCAATAATCACAGCA	Homozygous affected	TGACGTCTAACCAATAATCACAGCA	CGACGTCTAACTAATAATCACAGCA	TGACGTCTAACCAATAATCACAGCA	TGGAACTCACTCCGTGGGTACAATA
CC3	2912	Liveborn	-0.039024	CGACGTCTAACTAATAATCACAGCA	TAGAATCTGACTAACAATCACAATA	Non-carrier	TGACGTCTAACCAATAATCACAGCA	CGACGTCTAACTAATAATCACAGCA	TAGAATCTGACTAACAATCACAATA	TGACGTCTAACCAATAATCACAGCA
CC3	2913	Liveborn	-0.424088	TGACGTCTAACCAATAATCACAGCA	CGACGTCTAACTAATAATCACAGCA	Carrier	TGACGTCTAACCAATAATCACAGCA	CGACGTCTAACTAATAATCACAGCA	TAGAATCTGACTAACAATCACAATA	TGACGTCTAACCAATAATCACAGCA
CC3	2914	Liveborn	0.0407717	CGACGTCTAACTAATAATCACAGCA	TAGAATCTGACTAACAATCACAATA	Non-carrier	TGACGTCTAACCAATAATCACAGCA	CGACGTCTAACTAATAATCACAGCA	TAGAATCTGACTAACAATCACAATA	TGACGTCTAACCAATAATCACAGCA
CC3	2915	Liveborn	-0.061944	CGACGTCTAACTAATAATCACAGCA	TAGAATCTGACTAACAATCACAATA	Non-carrier	TGACGTCTAACCAATAATCACAGCA	CGACGTCTAACTAATAATCACAGCA	TAGAATCTGACTAACAATCACAATA	TGACGTCTAACCAATAATCACAGCA
CC3	2916	Liveborn	-0.448827	TAGAATCTGACTAACAATCACAATA	TGACGTCTAACCAATAATCACAGCA	Carrier	TGACGTCTAACCAATAATCACAGCA	CGACGTCTAACTAATAATCACAGCA	TAGAATCTGACTAACAATCACAATA	TGACGTCTAACCAATAATCACAGCA
CC3	2917	Liveborn	-0.408897	TAGAATCTGACTAACAATCACAATA	TGACGTCTAACCAATAATCACAGCA	Carrier	TGACGTCTAACCAATAATCACAGCA	CGACGTCTAACTAATAATCACAGCA	TAGAATCTGACTAACAATCACAATA	TGACGTCTAACCAATAATCACAGCA
CC3	2918	Liveborn	-0.49665	TAGAATCTGACTAACAATCACAATA	TGACGTCTAACCAATAATCACAGCA	Carrier	TGACGTCTAACCAATAATCACAGCA	CGACGTCTAACTAATAATCACAGCA	TAGAATCTGACTAACAATCACAATA	TGACGTCTAACCAATAATCACAGCA
CC3	2919	Liveborn	-0.40093	TGACGTCTAACCAATAATCACAGCA	CGACGTCTAACTAATAATCACAGCA	Carrier	TGACGTCTAACCAATAATCACAGCA	CGACGTCTAACTAATAATCACAGCA	TAGAATCTGACTAACAATCACAATA	TGACGTCTAACCAATAATCACAGCA
CC3	2920	Liveborn*	-4.30006	TGACGTCTAACCAATAATCACAGCA	TGACGTCTAACCAATAATCACAGCA	Homozygous affected	TGACGTCTAACCAATAATCACAGCA	CGACGTCTAACTAATAATCACAGCA	TAGAATCTGACTAACAATCACAATA	TGACGTCTAACCAATAATCACAGCA
CC3	2921	Liveborn	0.0115607	CGACGTCTAACTAATAATCACAGCA	TAGAATCTGACTAACAATCACAATA	Non-carrier	TGACGTCTAACCAATAATCACAGCA	CGACGTCTAACTAATAATCACAGCA	TAGAATCTGACTAACAATCACAATA	TGACGTCTAACCAATAATCACAGCA
CC3	2923	Liveborn	-0.00980824	CGACGTCTAACTAATAATCACAGCA	TAGAATCTGACTAACAATCACAATA	Non-carrier	TGACGTCTAACCAATAATCACAGCA	CGACGTCTAACTAATAATCACAGCA	TAGAATCTGACTAACAATCACAATA	TGACGTCTAACCAATAATCACAGCA
CC3	2924	Liveborn	-0.452449	TGACGTCTAACCAATAATCACAGCA	TAGAATCTGACTAACAATCACAATA	Carrier	TGACGTCTAACCAATAATCACAGCA	CGACGTCTAACTAATAATCACAGCA	TAGAATCTGACTAACAATCACAATA	TGACGTCTAACCAATAATCACAGCA
CC3	2925	Liveborn	-0.324448	TGACGTCTAACCAATAATCACAGCA	CGACGTCTAACTAATAATCACAGCA	Carrier	TGACGTCTAACCAATAATCACAGCA	CGACGTCTAACTAATAATCACAGCA	TAGAATCTGACTAACAATCACAATA	TGACGTCTAACCAATAATCACAGCA
CC3	2927	Liveborn	-0.0740223	CGACGTCTAACTAATAATCACAGCA	TAGAATCTGACTAACAATCACAATA	Non-carrier	TGACGTCTAACCAATAATCACAGCA	CGACGTCTAACTAATAATCACAGCA	TAGAATCTGACTAACAATCACAATA	TGACGTCTAACCAATAATCACAGCA
CC3	2928	Liveborn	-0.38076	TGACGTCTAACCAATAATCACAGCA	CGACGTCTAACTAATAATCACAGCA	Carrier	TGACGTCTAACCAATAATCACAGCA	CGACGTCTAACTAATAATCACAGCA	TAGAATCTGACTAACAATCACAATA	TGACGTCTAACCAATAATCACAGCA
CC3	2929	Stillborn	0.0451118	TAGAATCTGACTAACAATCACAATA	CGACGTCTAACTAATAATCACAGCA	Non-carrier	TGACGTCTAACCAATAATCACAGCA	CGACGTCTAACTAATAATCACAGCA	TAGAATCTGACTAACAATCACAATA	TGACGTCTAACCAATAATCACAGCA
CC3	2930	Stillborn	-0.337	CGACGTCTAACTAATAATCACAGCA	TGACGTCTAACCAATAATCACAGCA	Carrier	TGACGTCTAACCAATAATCACAGCA	CGACGTCTAACTAATAATCACAGCA	TAGAATCTGACTAACAATCACAATA	TGACGTCTAACCAATAATCACAGCA
CC3	2931	Stillborn	-3.6064	TGACGTCTAACCAATAATCACAGCA	TGACGTCTAACCAATAATCACAGCA	Homozygous affected	TGACGTCTAACCAATAATCACAGCA	CGACGTCTAACTAATAATCACAGCA	TAGAATCTGACTAACAATCACAATA	TGACGTCTAACCAATAATCACAGCA
CC4	8594	Liveborn	-0.363367	TGGAACTTAACCAATAATCACAGCA	TGACGTCTAACCAATAATCACAGCA	Carrier	TGACGTCTAACCAATAATCACAGCA	TGGAACTTAACCAATAATCACAGCA	TGACGTCTAACCAATAATCACAGCA	CGACGTCTAACTAATAATCACAGCA
CC4	8595	Liveborn	-0.352737	TGACGTCTAACCAATAATCACAGCA	TGGAACTTAACCAATAATCACAGCA	Carrier	TGACGTCTAACCAATAATCACAGCA	TGGAACTTAACCAATAATCACAGCA	TGACGTCTAACCAATAATCACAGCA	CGACGTCTAACTAATAATCACAGCA
CC4	8596	Liveborn	-0.348364	TGGAACTTAACCAATAATCACAGCA	TGACGTCTAACCAATAATCACAGCA	Carrier	TGACGTCTAACCAATAATCACAGCA	TGGAACTTAACCAATAATCACAGCA	TGACGTCTAACCAATAATCACAGCA	CGACGTCTAACTAATAATCACAGCA
CC4	8597	Liveborn	-0.368455	TGACGTCTAACCAATAATCACAGCA	TGGAACTTAACCAATAATCACAGCA	Carrier	TGACGTCTAACCAATAATCACAGCA	TGGAACTTAACCAATAATCACAGCA	TGACGTCTAACCAATAATCACAGCA	CGACGTCTAACTAATAATCACAGCA
CC4	8598	Liveborn	-0.0565816	TGGAACTTAACCAATAATCACAGCA	CGACGTCTAACTAATAATCACAGCA	Non-carrier	TGACGTCTAACCAATAATCACAGCA	TGGAACTTAACCAATAATCACAGCA	TGACGTCTAACCAATAATCACAGCA	CGACGTCTAACTAATAATCACAGCA
CC4	8599	Liveborn	-0.304516	TGACGTCTAACCAATAATCACAGCA	CGACGTCTAACTAATAATCACAGCA	Carrier	TGACGTCTAACCAATAATCACAGCA	TGGAACTTAACCAATAATCACAGCA	TGACGTCTAACCAATAATCACAGCA	CGACGTCTAACTAATAATCACAGCA
CC4	8600	Liveborn	-0.0346126	CGACGTCTAACTAATAATCACAGCA	TGGAACTTAACCAATAATCACAGCA	Non-carrier	TGACGTCTAACCAATAATCACAGCA	TGGAACTTAACCAATAATCACAGCA	TGACGTCTAACCAATAATCACAGCA	CGACGTCTAACTAATAATCACAGCA
CC4	8601	Liveborn	-0.0605401	CGACGTCTAACTAATAATCACAGCA	TGGAACTTAACCAATAATCACAGCA	Non-carrier	TGACGTCTAACCAATAATCACAGCA	TGGAACTTAACCAATAATCACAGCA	TGACGTCTAACCAATAATCACAGCA	CGACGTCTAACTAATAATCACAGCA
CC4	8602	Liveborn	-0.0143206	CGACGTCTAACTAATAATCACAGCA	TGGAACTTAACCAATAATCACAGCA	Non-carrier	TGACGTCTAACCAATAATCACAGCA	TGGAACTTAACCAATAATCACAGCA	TGACGTCTAACCAATAATCACAGCA	CGACGTCTAACTAATAATCACAGCA
CC4	8603	Liveborn	-0.325889	CGACGTCTAACTAATAATCACAGCA	TGACGTCTAACCAATAATCACAGCA	Carrier	TGACGTCTAACCAATAATCACAGCA	TGGAACTTAACCAATAATCACAGCA	TGACGTCTAACCAATAATCACAGCA	CGACGTCTAACTAATAATCACAGCA
CC4	8604	Stillborn	-0.370263	TGGAACTTAACCAATAATCACAGCA	TGACGTCTAACCAATAATCACAGCA	Carrier	TGACGTCTAACCAATAATCACAGCA	TGGAACTTAACCAATAATCACAGCA	TGACGTCTAACCAATAATCACAGCA	CGACGTCTAACTAATAATCACAGCA
CC4	8605	Stillborn	-0.356885	TGGAACTTAACCAATAATCACAGCA	TGACGTCTAACCAATAATCACAGCA	Carrier	TGACGTCTAACCAATAATCACAGCA	TGGAACTTAACCAATAATCACAGCA	TGACGTCTAACCAATAATCACAGCA	CGACGTCTAACTAATAATCACAGCA
CC4	8609	Mummified	-1.39404	TGACGTCTAACCAATAATCACAGCA	TGACGTCTAACCAATAATCACAGCA	Homozygous affected	TGACGTCTAACCAATAATCACAGCA	TGGAACTTAACCAATAATCACAGCA	TGACGTCTAACCAATAATCACAGCA	CGACGTCTAACTAATAATCACAGCA
		* Died shortly after birth
